# Supplementary material for: In vitro evaluation of antifungal activity of monolaurin against Candida albicans biofilms
Source: PeerJ. 2016 Jun 22;4:e2148. doi: 10.7717/peerj.2148 (PMC4924139; doi:10.7717/peerj.2148)
Supplement: Supplemental Information 1 [file peerj-04-2148-s001.xlsx]

## Sheet: Sheet1
Biofilm Analysis 5-17-15
Before Weight (mg)	V 1% ETOH	Fluconazole +	Lauroyl 1250	Lauroyl 2500
1	1101.2	1131.3	1133.2	1097.7
2	1107.9	1112	1132.8	1104.5
3	1112	1101.7	1112	1108.9
4	1093.7	1094	1094.3	1095.1
After Weight (mg)	V 1% ETOH	Fluconazole +	Lauroyl 1250	Lauroyl 2500
1	1140.1	1110.1	1138.7	1105.1
2	1122	1116.4	1139.1	1113.7
3	1111.3	1122.8	1119.4	1118.4
4	1102.6	1102.1	1150.8	1103
Difference (mg)	V 1% ETOH	Fluconazole +	Lauroyl 1250	Lauroyl 2500
1	38.9	-21.2	5.5	7.4
2	14.1	4.4	6.3	9.2
3	-0.7	21.1	7.4	9.5
4	8.9	8.1	56.5	7.9
average (mg)	15.3	3.1	18.925	8.5
Number of Colonies	-3	-4	-5
V 1% ETOH	491	50	18
Fluconazole +	824	79	6
Lauroyl 1250	30	3	2
Lauroyl 2500	48	1	0
