# Supplementary material for: In vitro evaluation of antifungal activity of monolaurin against Candida albicans biofilms
Source: PeerJ. 2016 Jun 22;4:e2148. doi: 10.7717/peerj.2148 (PMC4924139; doi:10.7717/peerj.2148)
Supplement: Supplemental Information 3 [file peerj-04-2148-s003.xlsx]

## Sheet: Sheet1
[Lauroyl] (μM)	V	3.90625	7.8125	15.625	31.25	62.5	125	250	500	1000	2000
1	7890.48	5753.08	5748.03	5195.05	5608.71	5454.44	6020.32	3832.54	3592.95	2975.88	4144.46
2	8867.81	8912.38	5537.45	5971.73	4985.28	5579.7	7631.61	5185.4	2872.68	3635.18	4344.38
3	8187.26	6193.97	8416.37	6114.73	5953.68	5829.32	5594.31	6317.77	3618.01	3612.63	4218.51
Avg	8315.18	6953.14	6567.28	5760.5	5515.89	5621.15	6415.42	5111.9	3361.21	3407.9	4235.78
%
1	94.8924	69.1877	69.1269	62.4767	67.4514	65.5962	72.4015	46.0909	43.2095	35.7885	49.842
2	106.646	107.182	66.5944	71.8171	59.9539	67.1025	91.7792	62.3606	34.5474	43.7174	52.2464
3	98.4615	74.4899	101.217	73.5369	71.6001	70.1045	67.2783	75.9788	43.5109	43.4462	50.7326
Avg	100	83.6198	78.9794	69.2769	66.3351	67.6011	77.153	61.4767	40.4226	40.984	50.9403
SD	6.02592	20.5769	19.2998	5.9516	5.90279	2.29514	12.9231	14.9635	5.09025	4.5015	1.21557
