# Supplementary material for: In vitro evaluation of antifungal activity of monolaurin against Candida albicans biofilms
Source: PeerJ. 2016 Jun 22;4:e2148. doi: 10.7717/peerj.2148 (PMC4924139; doi:10.7717/peerj.2148)
Supplement: Supplemental Information 5 [file peerj-04-2148-s005.xlsx]

## Sheet: Dry Weight Difference
Dry Weight															Proteinase
Before	V	Trypsin	PA2	EO1	EO2	G1	G2	Qx10	Qx20	Mx10	Mx20	C 125	L 1250	L 2500
1	953.4	948.4	953.5	941	941.9	937.2	935.2	940.9	936.8	941.5	953.5	953.4	987.4	941.2
2	932.5	940	991.3			936.5	936.5	948	985.5	943	940.8		948.1	939.7
3	936.4	941.5	986			948.3	935.4	942	935.5	989.5	989.4		941	936.2
4		937	980.2					942.6	993.4	947.9	948.2
After	V	Trypsin	PA2	EO1	EO2	G1	G2	Qx10	Qx20	Mx10	Mx20	C 125	L 1250	L 2500
1	954.8	953.3	958.5	942.5	944.1	938.3	936.6		939.8	942.8	955.8	955.4	989.2	942.9
2	934.5	944.8	994.9			938.5	937.7	951.2	988	945	949.5		949.8	941.8
3	938.2	944.6	989.7			949.6	936.5	945.5	937.6	991.5	991.4		942.2	937.8
4		941.1	984.1					945.2	995.6	949.9	950.5
Difference	V	Trypsin	PA2	EO1	EO2	G1	G2	Qx10	Qx20	Mx10	Mx20	C 125	L 1250	L 2500
1	1.4	4.9	5	1.5	2.2	1.1	1.4		3	1.3	2.3	2	1.8	1.7
2	2	4.8	3.6			2	1.2	3.2	2.5	2	8.7		1.7	2.1
3	1.8	3.1	3.7			1.3	1.1	3.5	2.1	2	2		1.2	1.6
4		4.1	3.9					2.6	2.2	2	2.3
grams (x10 dilution)
	V	Trypsin	PA2	EO1	EO2	G1	G2	Qx10	Qx20	Mx10	Mx20	C 125	L 1250	L 2500
	0.014	0.04	0.05	0.015	0.022	0.011	0.014	0.032	0.03	0.013	0.023	0.02	0.018	0.017
	0.02	0.048	0.036			0.02	0.012	0.035	0.025	0.02	0.087		0.017	0.021
	0.018	0.041	0.039			0.013	0.11	0.026	0.021	0.02	0.02		0.012	0.016
	0.029	0.029	0.017	0.0265	0.028		0.028	0.15	0.06	0.03	0.08	0.028	0.025	-
	0.028	0.028	0.015	0.0252			0.027	0.174	0.065	0.04	0.071		0.025	0.0264
	0.029	0.029	0.017	0.0258			0.027	0.16	0.066	0.04	0.078		0.0246	0.0276
Absorbance proteinase
	v	Trypsin	PA2	Qx10	Qx20	Mx10	Mx20	G1	G2	C2		L 1250	L 2500
	0.482759	1.37931	2.94118	0.5	0.5	0.433333	0.2875			0.01		0.72	0.643939
	0.714286	1.71429	2.4	0.384615	0.384615	0.5	1.22535					0.68	0.795455
	0.62069	1.41379	2.29412	0.1625	0.318182	0.25641	0.25641					0.487805	0.57971
	V	Trypsin	PA2	Qx10	Qx20	Mx10	Mx20	G1	G2	L 1250	L 2500	EO1	EO2	C 125
Results	0.998	1.4	1.5	1.22	1.06	0.88	0.97	0.4709	0.48	0.976	0.93	0.85	0.51	0.91
	0.952	1.7	1.29	1.18	1.03	1.12	1.08	0.4734	0.49	0.9434	0.96
	0.8995	1.45	1.39	1.09	1.08	0.97	0.96	0.4182	0.46	0.87	0.98
		1.6	1.3	1.03	1.13	1.15	0.88
					1.2
	34.4138	48.2759	88.2353	39.04	34.4444
	34	60.7143	86	37.736	36.3636
	31.0172	50	81.7647	35.3659	35.5072

## Sheet: Proteinase
Absorbance Reading		Proteinase															Proteinase
	V	Trypsin	PA2	Qx10	Qx20	Mx10	Mx20	G1	G2	L 1250	L 2500	EO1	EO2	C 125		V	Trypsin	PA2	Qx10	Qx20	Mx10	Mx20	G1	G2	L 1250	L 2500	EO1	EO2	C 125
1	0.029	0.017	0.15	0.06	0.03	0.08		0.028	0.025	-	0.0265	0.028	0.028	0.0272
2	0.028	0.015	0.174	0.065	0.04	0.071		0.027	0.025	0.0264	0.0252
3	0.029	0.017	0.16	0.066	0.04	0.078		0.027	0.0246	0.0276	0.0258
Before	V	Trypsin	PA2	EO1	EO2	G1	G2	Qx10	Qx20	Mx10	Mx20	C 125	L 1250	L 2500
1	953.4	948.4	953.5	941	941.9	937.2	935.2	940.9	936.8	941.5	953.5	953.4	987.4	941.2
2	932.5	940	991.3			936.5	936.5	948	985.5	943	940.8		948.1	939.7
3	936.4	941.5	986			948.3	935.4	942	935.5	989.5	989.4		941	936.2
4		937	980.2					942.6	993.4	947.9	948.2
After	V	Trypsin	PA2	EO1	EO2	G1	G2	Qx10	Qx20	Mx10	Mx20	C 125	L 1250	L 2500
1	954.8	953.3	958.5	942.5	944.1	938.3	936.6		939.8	942.8	955.8	955.4	989.2	942.9
2	934.5	944.8	994.9			938.5	937.7	951.2	988	945	949.5		949.8	941.8
3	938.2	944.6	989.7			949.6	936.5	945.5	937.6	991.5	991.4		942.2	937.8
4		941.1	984.1					945.2	995.6	949.9	950.5
Difference	V	Trypsin	PA2	EO1	EO2	G1	G2	Qx10	Qx20	Mx10	Mx20	C 125	L 1250	L 2500
1	1.4	4.9	5	1.5	2.2	1.1	1.4		3	1.3	2.3	2	1.8	1.7
2	2	4.8	3.6			2	1.2	3.2	2.5	2	8.7		1.7	2.1
3	1.8	3.1	3.7			1.3	1.1	3.5	2.1	2	2		1.2	1.6
4		4.1	3.9					2.6	2.2	2	2.3

## Sheet: Phospholipase
Absorbance Reading		phospholipase
	V	Trypsin	PA2	Qx10	Qx20	Mx10	Mx20	G1	G2	L 1250	L 2500	EO1	EO2	C 125
1	0.998	1.4	1.5	1.22	1.06	0.88	0.97	0.4709	0.48	0.976	0.93	0.85	0.51	0.91
2	0.952	1.7	1.29	1.18	1.03	1.12	1.08	0.4734	0.49	0.9434	0.96
3	0.8995	1.45	1.39	1.09	1.08	0.97	0.96	0.4182	0.46	0.87	0.98
4		1.6	1.3	1.03	1.13	1.15	0.88
5					1.2
